# Supplementary material for: Geographic Pattern of Variations in Chemical Composition and Nutritional Value of Cinnamomum camphora Seed Kernels from China
Source: MDPI journal article supplement (doi:10.3390/foods12132630), 2023-07-07
Supplement: s1 [file s1]

## Supplementary Material

**Table S1.** Correlation coefficients (r) between the parameters TPC, TFC, and DPPH.

|      | TPC   | TFC   | DPPH |
|------|-------|-------|------|
| TPC  | 1     | -     | -    |
| TFC  | 0.970 | 1     | -    |
| DPPH | 0.995 | 0.974 | 1    |

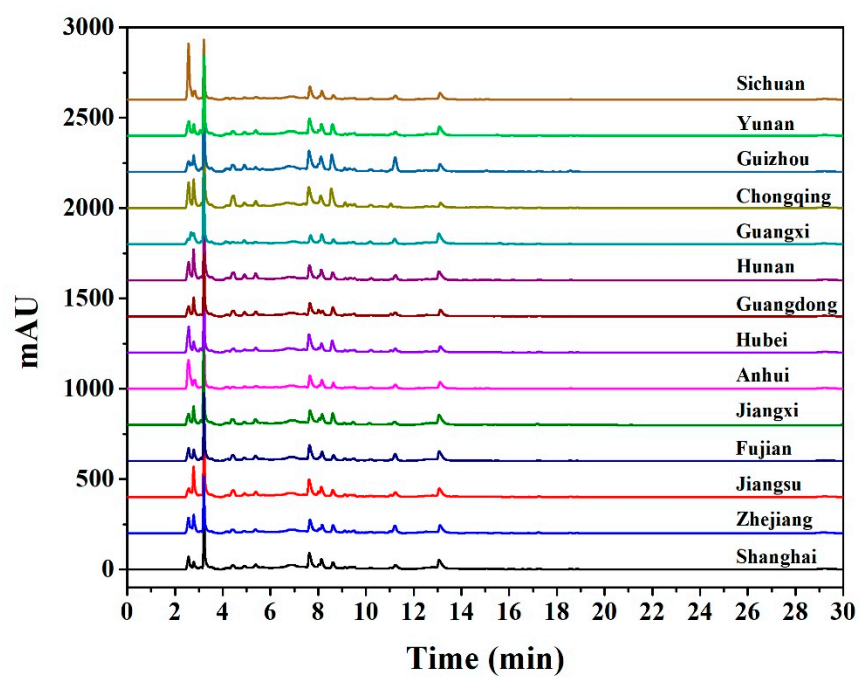

**Figure S1.** HPLC profile of the ethanol extract of CCSK samples, recorded at 280 nm.
